# Supplementary material
Source: PubMed Central journal article supplement (PMC7871119)
Supplement: sj-pdf-2-ebm-10.1177_1535370220961013.pdf [file sj-pdf-2-ebm-10.1177_1535370220961013.pdf]

Supplementary Table. 1 Correlation between LncRNA CCAT1 expression and clinicopathological parameters of NSCLC patients (n = 35)

| Clinical feature      | n  | LncRNA CCAT1 |     | P -Value      |
|-----------------------|----|--------------|-----|---------------|
|                       |    | High         | Low |               |
| Age                   |    |              |     | 0.3145        |
| ≥60                   | 20 | 12           | 8   |               |
| <60                   | 15 | 6            | 9   |               |
| Gender                |    |              |     | 0.1642        |
| Man                   | 22 | 9            | 13  |               |
| Woman                 | 13 | 9            | 4   |               |
| Tumor size            |    |              |     | <b>0.0275</b> |
| ≥3cm                  | 25 | 16           | 9   |               |
| <3cm                  | 10 | 2            | 8   |               |
| TNM state             |    |              |     | <b>0.0059</b> |
| III+IV                | 21 | 15           | 6   |               |
| I+II                  | 14 | 3            | 11  |               |
| Lymph node metastasis |    |              |     | <b>0.0045</b> |
| Negative              | 12 | 2            | 10  |               |
| Positive              | 23 | 16           | 7   |               |
